# Supplementary material for: Uncovering the Diversity and Activity of Methylotrophic Methanogens in Freshwater Wetland Soils
Source: PubMed Central journal article supplement (PMC6890927; doi:10.1128/msystems.00320-19), 2019-12-03

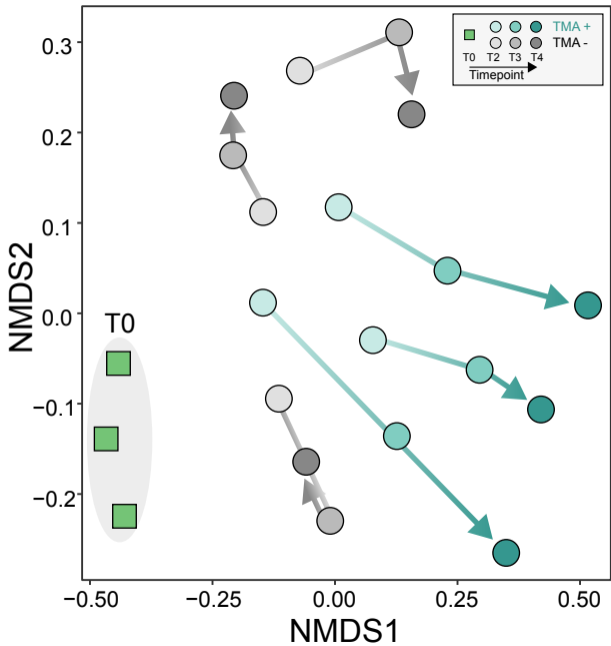

Supplement: mSystems.00320-19-sf001.pdf [file mSystems.00320-19-sf001.pdf]
