# Supplementary material for: Uncovering the Diversity and Activity of Methylotrophic Methanogens in Freshwater Wetland Soils
Source: PubMed Central journal article supplement (PMC6890927; doi:10.1128/msystems.00320-19), 2019-12-03
Supplement: mSystems.00320-19-sf002.pdf [file mSystems.00320-19-sf002.pdf]

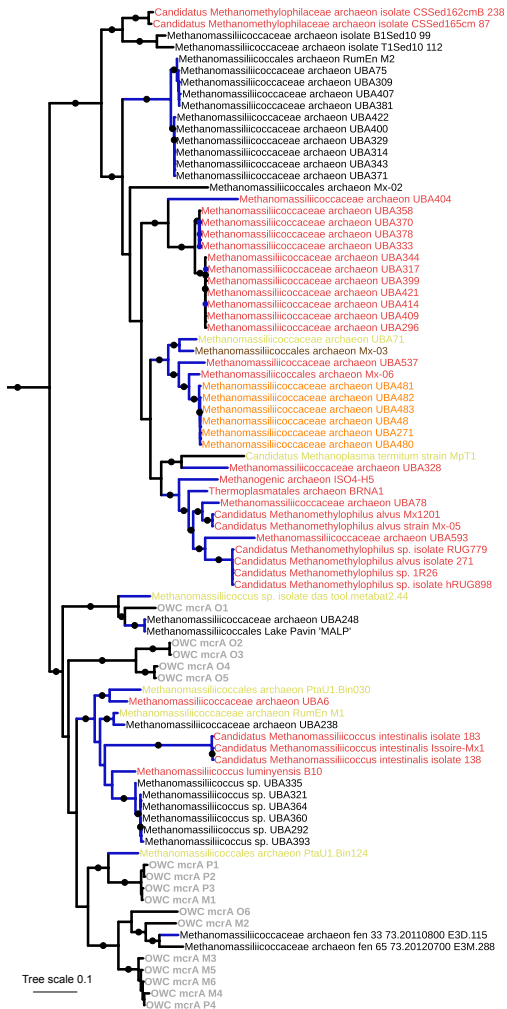

**Methyltransferases  
detected in genome / MAG**

**methylamine utilization**

*mttB, mtbB, mtmB*

*mttB, mtmB*

*mtbB, mtmB*

*mtmB* only

**methylamine utilization**

*mtaB*

*mtaB* not detected

no genome - not evaluated

Tree scale 0.1
