# Supplementary material for: Uncovering the Diversity and Activity of Methylotrophic Methanogens in Freshwater Wetland Soils
Source: PubMed Central journal article supplement (PMC6890927; doi:10.1128/msystems.00320-19), 2019-12-03
Supplement: mSystems.00320-19-st001.pdf [file mSystems.00320-19-st001.pdf]

| <b>SOIL MICROCOSMS methane produced (<math>\mu\text{mol}</math>)</b> |                                                 |           |           |           |
|----------------------------------------------------------------------|-------------------------------------------------|-----------|-----------|-----------|
|                                                                      | <b><math>\mu\text{mol}</math> Methane total</b> |           |           |           |
| <b>Timepoint</b>                                                     | <b>T0</b>                                       | <b>T2</b> | <b>T3</b> | <b>T4</b> |
| <b>Day</b>                                                           | <b>0</b>                                        | <b>9</b>  | <b>16</b> | <b>24</b> |
| <b>Soil TMA 1</b>                                                    | BD                                              | 2.56      | 33.51     | 14.28     |
| <b>Soil TMA 2</b>                                                    | 1.55                                            | 3.16      | 17.42     | 100.30    |
| <b>Soil TMA 3</b>                                                    | BD                                              | 1.32      | 5.57      | 76.28     |
| <b>Soil NO Substrate 1</b>                                           | BD                                              | 1.52      | 1.68      | BD        |
| <b>Soil NO Substrate 2</b>                                           | BD                                              | 1.53      | 1.63      | 1.69      |
| <b>Soil NO Substrate 3</b>                                           | BD                                              | 1.36      | 1.41      | 1.39      |
