# Supplementary material for: Uncovering the Diversity and Activity of Methylotrophic Methanogens in Freshwater Wetland Soils
Source: PubMed Central journal article supplement (PMC6890927; doi:10.1128/msystems.00320-19), 2019-12-03
Supplement: mSystems.00320-19-st002.pdf [file mSystems.00320-19-st002.pdf]

**SOIL MICROCOSMS H-NMR detected metabolites ( $\mu\text{M}$ )**

**A**

|                | Inoculum - T0 - after first addition of TMA |             |             | Final - T4     |                |              |              |              |
|----------------|---------------------------------------------|-------------|-------------|----------------|----------------|--------------|--------------|--------------|
|                | Soil_inoc_1                                 | Soil_inoc_2 | Soil_inoc_3 | Soil_TF_NoSub2 | Soil_TF_NoSub3 | Soil_TF_TMA3 | Soil_TF_TMA3 | Soil_TF_TMA3 |
| Acetate        | 8.1                                         | 11.5        | 7.3         | 13.3           | 42.4           | 297.5        | 238.0        | 187.9        |
| Acetone        | 3.6                                         | 4.0         | 3.4         | 4.2            | 4.0            | 4.0          | 4.1          | 3.9          |
| Butyrate       | 0.0                                         | 0.0         | 0.0         | 0.0            | 0.0            | 0.0          | 3.1          | 1.7          |
| Ethanol        | 0.0                                         | 26.8        | 0.0         | 4.8            | 11.1           | 0.0          | 15.1         | 21.8         |
| Formate        | 6.1                                         | 6.5         | 3.8         | 0.0            | 0.0            | 0.0          | 0.0          | 0.0          |
| Isobutyrate    | 0.0                                         | 0.0         | 0.0         | 0.0            | 0.0            | 5.4          | 6.5          | 2.8          |
| Isopropanol    | 0.0                                         | 1.6         | 0.8         | 0.7            | 1.2            | 0.7          | 1.4          | 1.8          |
| Isovalerate    | 0.0                                         | 0.0         | 0.0         | 0.0            | 0.0            | 3.1          | 4.2          | 1.2          |
| Methanol       | 0.0                                         | 4.3         | 1.0         | 0.0            | 1.4            | 0.0          | 1.4          | 2.0          |
| Methylamine    | 0.0                                         | 0.0         | 0.0         | 0.0            | 0.0            | 0.0          | 0.0          | 49.5         |
| Propionate     | 0.0                                         | 0.0         | 2.0         | 0.0            | 0.0            | 0.0          | 9.7          | 8.7          |
| Trimethylamine | 48.4                                        | 43.1        | 39.7        | 0.0            | 0.0            | 0.0          | 0.0          | 0.0          |

**B**

**FIELD SOILS**

|                        | Soil Depth (cm) | <i>in situ</i><br>Temperature ( $^{\circ}\text{C}$ ) | Dissolved Oxygen<br>( $\mu\text{M}$ ) | Porewater (SED_IC)<br>Acetate(mM) | H-NMR<br>Methanol ( $\mu\text{M}$ ) |
|------------------------|-----------------|------------------------------------------------------|---------------------------------------|-----------------------------------|-------------------------------------|
| August Plant Surface 1 | 5               | 25.4                                                 | 164.90                                | 0.61                              | 65.601                              |
| August Plant Surface 2 | 5               | 27.4                                                 | 104.40                                | 0.51                              | 39.6                                |
| August Plant Surface 3 | 5               | 25.0                                                 | 62.00                                 | 0.47                              | 25.086                              |
| August Plant Deep 1    | 25              | 24.1                                                 | 47.90                                 | 0.24                              | 1457                                |
| August Plant Deep 2    | 25              | 25.0                                                 | 1.75                                  | 0.34                              | 203.574                             |
| August Plant Deep 3    | 25              | 23.3                                                 | 0.22                                  | 0.30                              | 1305                                |

Panel A shows the H-NMR results for the microcosm soils. Note that the T0 measurement was taken after the addition of TMA to verify the concentration of TMA added. Panel B shows the H-NMR and IC data for field soil for methanol and acetate as previously reported in Angle et al. 2017.
