# Supplementary material for: Uncovering the Diversity and Activity of Methylotrophic Methanogens in Freshwater Wetland Soils
Source: PubMed Central journal article supplement (PMC6890927; doi:10.1128/msystems.00320-19), 2019-12-03
Supplement: mSystems.00320-19-st004.pdf [file mSystems.00320-19-st004.pdf]

## Vitamin Mix

| Components           | Amount mg L <sup>-1</sup> ddi H <sub>2</sub> O |
|----------------------|------------------------------------------------|
| d-Biotin             | 2                                              |
| Folic Acid           | 2                                              |
| Pyridoxine HCl       | 10                                             |
| Riboflavin           | 5                                              |
| Thiamine             | 5                                              |
| Nicotinic Acid       | 5                                              |
| Pantothenic Acid     | 5                                              |
| Vitamin B12          | 0.1                                            |
| p-Amino Benzoic Acid | 5                                              |
| D,L-6,8-Thiotic Acid | 5                                              |

## Mineral Mix

| Components                                             | Amount g L <sup>-1</sup> ddi H <sub>2</sub> O |
|--------------------------------------------------------|-----------------------------------------------|
| NTA Disodium Salt                                      | 1.5                                           |
| MgSO <sub>4</sub> ·7H <sub>2</sub> O                   | 3                                             |
| MnSO <sub>4</sub> ·H <sub>2</sub> O                    | 0.5                                           |
| NaCl                                                   | 1.0                                           |
| FeSO <sub>4</sub> ·7H <sub>2</sub> O                   | 0.1                                           |
| CaCl <sub>2</sub> ·2H <sub>2</sub> O                   | 0.1                                           |
| CoCl <sub>2</sub> ·6H <sub>2</sub> O                   | 0.1                                           |
| ZnCl                                                   | 0.13                                          |
| CuSO <sub>4</sub> ·5H <sub>2</sub> O                   | 0.01                                          |
| AlK(SO <sub>4</sub> ) <sub>2</sub> ·12H <sub>2</sub> O | 0.01                                          |
| Boric Acid                                             | 0.01                                          |
| Na <sub>2</sub> MoO <sub>4</sub> ·2H <sub>2</sub> O    | 0.025                                         |
| NiCl <sub>2</sub> ·6H <sub>2</sub> O                   | 0.024                                         |
| Na <sub>2</sub> WO <sub>4</sub> ·2H <sub>2</sub> O     | 0.025                                         |
| Na <sub>2</sub> SeO <sub>4</sub>                       | 0.02                                          |
